# Supplementary material for: Effect of Hen Genotype and Laying Time on Egg Quality and Albumen Lysozyme Content and Activity
Source: MDPI journal article supplement (doi:10.3390/ani13101611), 2023-05-11
Supplement: s1 [file s1]

Table S1. Correlations between some egg quality traits and lysozyme content and activity in the eggs of 56-week-old hens of 4 conservation strains collected at different times of the day

| Item                        | Lysozyme content (%)       |                     |                     |                     | Lysozyme activity (U/ml) |                     |                     |                     |
|-----------------------------|----------------------------|---------------------|---------------------|---------------------|--------------------------|---------------------|---------------------|---------------------|
|                             | thin albumen               |                     | thick albumen       |                     | thin albumen             |                     | thick albumen       |                     |
|                             | Time of egg collection (h) |                     |                     |                     |                          |                     |                     |                     |
|                             | 7:00                       | 13:00               | 7:00                | 13:00               | 7:00                     | 13:00               | 7:00                | 13:00               |
| Egg weight (g)              | -0.237                     | -0.379 <sup>Δ</sup> | -0.387 <sup>Δ</sup> | -0.558 <sup>Δ</sup> | 0.224                    | 0.389 <sup>Δ</sup>  | -0.087              | -0.170              |
| Air cell height             | 0.162                      | 0.433 <sup>Δ</sup>  | -0.073              | 0.358 <sup>Δ</sup>  | 0.454 <sup>Δ</sup>       | 0.100               | 0.105               | 0.237               |
| Albumen height (mm)         | -0.718 <sup>Δ</sup>        | -0.657 <sup>Δ</sup> | -0.397 <sup>Δ</sup> | -0.834 <sup>Δ</sup> | 0.214                    | 0.500 <sup>Δ</sup>  | -0.094 <sup>Δ</sup> | -0.277 <sup>Δ</sup> |
| Haugh unit                  | -0.708 <sup>Δ</sup>        | -0.610 <sup>Δ</sup> | -0.338 <sup>Δ</sup> | -0.791 <sup>Δ</sup> | 0.176                    | 0.493 <sup>Δ</sup>  | -0.082              | -0.269 <sup>Δ</sup> |
| Albumen pH                  | 0.613 <sup>Δ</sup>         | 0.482 <sup>Δ</sup>  | 0.475 <sup>Δ</sup>  | 0.792 <sup>Δ</sup>  | 0.051                    | -0.551 <sup>Δ</sup> | 0.221 <sup>x</sup>  | 0.260 <sup>Δ</sup>  |
| Yolk weight (g)             | 0.028                      | -0.146              | 0.005               | -0.381 <sup>Δ</sup> | 0.372 <sup>Δ</sup>       | 0.409 <sup>Δ</sup>  | -0.117              | -0.006              |
| Yolk pH                     | 0.364 <sup>Δ</sup>         | 0.191               | 0.364 <sup>Δ</sup>  | 0.416 <sup>Δ</sup>  | -0.486 <sup>Δ</sup>      | -0.598 <sup>Δ</sup> | -0.146              | -0.002              |
| Albumen weight (g)          | -0.257 <sup>Δ</sup>        | -0.258 <sup>Δ</sup> | -0.426 <sup>Δ</sup> | -0.428 <sup>Δ</sup> | 0.072                    | 0.223               | -0.062              | -0.164              |
| Yolk colour: L*             | -0.138                     | 0.062               | -0.088              | -0.030              | -0.201                   | 0.039               | -0.054              | -0.015              |
| a*                          | 0.030                      | -0.158              | -0.113              | -0.205              | 0.196                    | 0.074               | 0.183               | -0.070              |
| b*                          | -0.254                     | -0.362 <sup>Δ</sup> | -0.334 <sup>Δ</sup> | -0.395 <sup>Δ</sup> | 0.024                    | 0.184               | 0.071               | -0.129              |
| Shell colour: L*            | -0.036                     | -0.233              | -0.406 <sup>Δ</sup> | 0.123               | -0.182                   | -0.153              | 0.146               | 0.240               |
| a*                          | -0.060                     | 0.129               | 0.309 <sup>Δ</sup>  | -0.256              | 0.295 <sup>Δ</sup>       | 0.218               | -0.183              | -0.301 <sup>Δ</sup> |
| b*                          | 0.340 <sup>Δ</sup>         | 0.469 <sup>Δ</sup>  | 0.590 <sup>Δ</sup>  | 0.162               | 0.060                    | -0.035              | -0.095              | -0.081              |
| Shell weight (g)            | -0.318 <sup>Δ</sup>        | -0.413 <sup>Δ</sup> | -0.383 <sup>Δ</sup> | -0.499 <sup>Δ</sup> | 0.250                    | 0.273 <sup>y</sup>  | 0.024               | -0.127              |
| Shell thickness (μm)        | -0.330 <sup>Δ</sup>        | -0.350 <sup>Δ</sup> | -0.298 <sup>Δ</sup> | -0.261 <sup>Δ</sup> | 0.230                    | 0.059               | 0.031               | 0.050               |
| Shell porosity (pores/cm²)  | -0.699 <sup>Δ</sup>        | -0.475 <sup>Δ</sup> | -0.406 <sup>Δ</sup> | -0.480 <sup>Δ</sup> | 0.144                    | 0.001               | -0.177              | -0.099              |
| Shell crushing strength (N) | -0.225                     | -0.287 <sup>Δ</sup> | -0.010              | -0.359 <sup>Δ</sup> | 0.248                    | 0.157               | 0.186 <sup>x</sup>  | -0.273 <sup>Δ</sup> |

Columns with the superscript (Δ) are significantly correlated ( $p < 0.05$ ) for time of egg collection and each trait; L\* – lightness, a\* – redness, b\* – yellowness
